# Supplementary material for: Chicken Skin Decontamination of Thermotolerant Campylobacter spp. and Hygiene Indicator Escherichia coli Assessed by Viability Real-Time PCR
Source: MDPI journal article supplement (doi:10.3390/pathogens11060706), 2022-06-18
Supplement: s1 [file s1]

## Supplementary materials

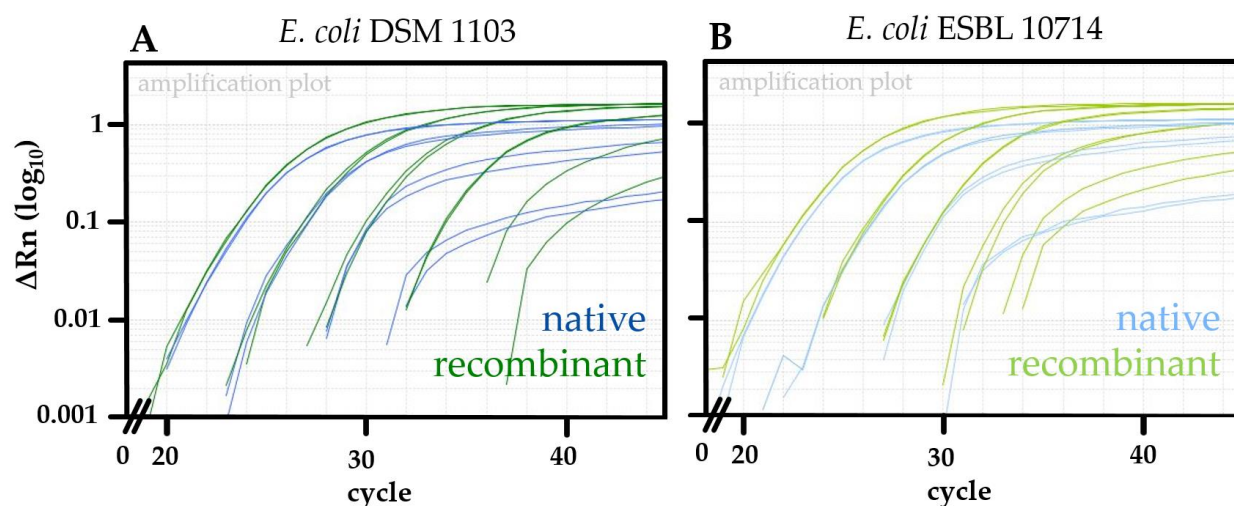

**Figure S1. Standard amplification curves obtained with the recombinant versus native Taq polymerases.** The different amplification efficiency of the tested enzymes becomes apparent at lower copy numbers. Amplification of five decimal dilutions of 50.000 to 5 genomic copies/reaction are depicted. Green, recombinant Platinum Taq polymerase; blue, native *Thermophilus aquaticus* polymerase. (A) *E. coli* DSM1103 DNA standard (B) *E. coli* ESBL 10714 DNA standard.

**Table S1.** List of field isolates tested for sensitivity and specificity of the *uidA*-based qPCR.

| Species                             | BfR strain No.                      | Serotype  | Characteristics | Origin  | Product      | MUG |
|-------------------------------------|-------------------------------------|-----------|-----------------|---------|--------------|-----|
| <i>Aeromonas jandaei</i>            | BfR-EC-16179                        | O56       |                 | chicken | meat         | -   |
| <i>Citrobacter koseri</i>           | BfR-EC-16493                        | ONT:[HNT] | nd              | cattle  | milk         | -   |
| <i>Enterobacter cloacae</i> complex | BfR-EC-15955                        | ONT:[HNT] | nd              | cattle  | milk         | -   |
| <i>Escherichia albertii</i>         | BfR-EC-16090                        | O65:[HNT] | diarrhea        | human   | clinical     | -   |
| <i>Escherichia albertii</i>         | BfR-EC-16091                        | ONT/O127  | diarrhea        | human   | clinical     | -   |
| <i>Escherichia coli</i>             | <i>E. coli</i> 10714 (BfR-CA-15244) | nd        | TEM-52          | chicken | meat         | +   |
| <i>Escherichia coli</i>             | BfR-EC-11061                        | ONT:H7    | commensal       | chicken | faeces       | +   |
| <i>Escherichia coli</i>             | BfR-EC-11062                        | ONT:H4    | commensal       | chicken | faeces       | +   |
| <i>Escherichia coli</i>             | BfR-EC-11063                        | O78:NM    | commensal       | chicken | faeces       | +   |
| <i>Escherichia coli</i>             | BfR-EC-11734                        | O157:NM   | commensal       | chicken | meat         | +   |
| <i>Escherichia coli</i>             | BfR-EC-11735                        | O157:NM   | commensal       | chicken | meat         | +   |
| <i>Escherichia coli</i>             | BfR-EC-11755                        | O68:NM    | commensal       | chicken | meat         | +   |
| <i>Escherichia coli</i>             | BfR-EC-11756                        | O182:NM   | commensal       | chicken | meat         | +   |
| <i>Escherichia coli</i>             | BfR-EC-11757                        | O120:H4   | commensal       | chicken | meat         | +   |
| <i>Escherichia coli</i>             | BfR-EC-11758                        | O120:H4   | commensal       | chicken | meat         | +   |
| <i>Escherichia coli</i>             | BfR-EC-11759                        | O9:NM     | commensal       | chicken | meat         | +   |
| <i>Escherichia coli</i>             | BfR-EC-11760                        | O78:NM    | commensal       | chicken | meat         | +   |
| <i>Escherichia coli</i>             | BfR-EC-11842                        | O78:NM    | commensal       | goose   | inner organs | +   |
| <i>Escherichia coli</i>             | BfR-EC-11893                        | O22:H7    | commensal       | chicken | meat         | +   |
| <i>Escherichia coli</i>             | BfR-EC-11894                        | O22:H2    | commensal       | chicken | meat         | +   |

|                         |              |            |                  |              |                 |     |
|-------------------------|--------------|------------|------------------|--------------|-----------------|-----|
| <i>Escherichia coli</i> | BfR-EC-12047 | O45:[H2]   | STEC, stx1+      | unknown      | unknown         | (+) |
| <i>Escherichia coli</i> | BfR-EC-12481 | O153:H12   | commensal        | chicken      | faeces          | +   |
| <i>Escherichia coli</i> | BfR-EC-12482 | O153:H12   | commensal        | chicken      | faeces          | +   |
| <i>Escherichia coli</i> | BfR-EC-12499 | O103:[H11] | STEC, stx1+      | cattle       | faeces          | +   |
| <i>Escherichia coli</i> | BfR-EC-13091 | O88:H8     | commensal        | chicken      | meat            | +   |
| <i>Escherichia coli</i> | BfR-EC-13092 | Or:H19     | commensal        | chicken      | meat            | +   |
| <i>Escherichia coli</i> | BfR-EC-13093 | Or:H4      | commensal        | chicken      | meat            | (+) |
| <i>Escherichia coli</i> | BfR-EC-13094 | Or:H4      | commensal        | chicken      | meat            | +   |
| <i>Escherichia coli</i> | BfR-EC-13095 | O1:H7      | commensal        | chicken      | meat            | +   |
| <i>Escherichia coli</i> | BfR-EC-13096 | O2:H9      | commensal        | chicken      | meat            | +   |
| <i>Escherichia coli</i> | BfR-EC-13097 | O78/149:H4 | commensal        | chicken      | meat            | (+) |
| <i>Escherichia coli</i> | BfR-EC-13098 | Or:H4      | commensal        | chicken      | meat            | +   |
| <i>Escherichia coli</i> | BfR-EC-13099 | O16:H11    | commensal        | chicken      | unknown         | -   |
| <i>Escherichia coli</i> | BfR-EC-13216 | O136:H40   | EPEC             | chicken      | meat            | +   |
| <i>Escherichia coli</i> | BfR-EC-13217 | O9:H10     | EPEC             | chicken      | meat            | +   |
| <i>Escherichia coli</i> | BfR-EC-13218 | O103:H2    | EPEC             | chicken      | meat            | +   |
| <i>Escherichia coli</i> | BfR-EC-13573 | O89:[H8]   | commensal        | turkey       | meat            | +   |
| <i>Escherichia coli</i> | BfR-EC-13574 | O103:[H16] | commensal        | turkey       | meat            | +   |
| <i>Escherichia coli</i> | BfR-EC-13575 | O15:[H27]  | STEC, stx1+      | turkey       | meat            | +   |
| <i>Escherichia coli</i> | BfR-EC-13581 | O9:[H51]   | commensal        | turkey       | meat            | -   |
| <i>Escherichia coli</i> | BfR-EC-13616 | O8:[H25]   | commensal        | chicken      | unknown         | -   |
| <i>Escherichia coli</i> | BfR-EC-13671 | O82:H40    | EPEC             | chicken      | meat            | +   |
| <i>Escherichia coli</i> | BfR-EC-13702 | O82:H40    | EPEC             | chicken      | meat            | +   |
| <i>Escherichia coli</i> | BfR-EC-13703 | O82:H40    | EPEC             | chicken      | meat            | +   |
| <i>Escherichia coli</i> | BfR-EC-13712 | O157:[H7]  | EPEC             | cattle       | meat            | +   |
| <i>Escherichia coli</i> | BfR-EC-13713 | O157:[H7]  | STEC, stx2+      | cattle       | meat            | +   |
| <i>Escherichia coli</i> | BfR-EC-13714 | O157:[H7]  | STEC, stx2+      | cattle       | meat            | +   |
| <i>Escherichia coli</i> | BfR-EC-13715 | O157:[H7]  | STEC, stx2+      | cattle       | meat            | +   |
| <i>Escherichia coli</i> | BfR-EC-13716 | O157:[H7]  | STEC, stx2+      | cattle       | meat            | +   |
| <i>Escherichia coli</i> | BfR-EC-13717 | O157:[H7]  | STEC, stx2+      | cattle       | meat            | +   |
| <i>Escherichia coli</i> | BfR-EC-13718 | O157:[H7]  | EPEC             | cattle       | meat            | +   |
| <i>Escherichia coli</i> | BfR-EC-13813 | O113:H6    | EPEC             | turkey       | meat            | +   |
| <i>Escherichia coli</i> | BfR-EC-13814 | O113:H6    | EPEC             | turkey       | meat            | +   |
| <i>Escherichia coli</i> | BfR-EC-13938 | O80:NM     | EPEC             | chicken      | meat            | +   |
| <i>Escherichia coli</i> | BfR-EC-13946 | O186:H40   | EPEC             | chicken      | meat            | +   |
| <i>Escherichia coli</i> | BfR-EC-13947 | O186:H40   | EPEC             | chicken      | meat            | +   |
| <i>Escherichia coli</i> | BfR-EC-13948 | O186:H40   | EPEC             | chicken      | meat            | +   |
| <i>Escherichia coli</i> | BfR-EC-14612 | O157:[H7]  | STEC, stx1+stx2+ | wild animals | meat            | -   |
| <i>Escherichia coli</i> | BfR-EC-14642 | O45:[H2]   | STEC, stx1+      | unknown      | unknown         | -   |
| <i>Escherichia coli</i> | BfR-EC-14794 | O136:H40   | EPEC             | chicken      | inner organs    | +   |
| <i>Escherichia coli</i> | BfR-EC-14795 | O136:H40   | EPEC             | chicken      | meat            | +   |
| <i>Escherichia coli</i> | BfR-EC-14815 | O136:H40   | EPEC             | chicken      | meat            | +   |
| <i>Escherichia coli</i> | BfR-EC-14816 | O91:H40    | EPEC             | chicken      | meat            | +   |
| <i>Escherichia coli</i> | BfR-EC-14817 | Or:H40     | EPEC             | chicken      | meat            | +   |
| <i>Escherichia coli</i> | BfR-EC-14883 | O16:NM     | commensal        | chicken      | meat            | +   |
| <i>Escherichia coli</i> | BfR-EC-14899 | O157:[H7]  | STEC, stx1+stx2+ | cattle       | faeces          | -   |
| <i>Escherichia coli</i> | BfR-EC-14910 | ONT:[H26]  | EPEC             | chicken      | meat            | -   |
| <i>Escherichia coli</i> | BfR-EC-14920 | O157:[H7]  | STEC, stx2+      | unknown      | red minced meat | -   |

|                         |              |               |                  |              |              |     |
|-------------------------|--------------|---------------|------------------|--------------|--------------|-----|
| <i>Escherichia coli</i> | BfR-EC-14955 | O157:[H7]     | STEC, stx2+      | cattle       | milk         | -   |
| <i>Escherichia coli</i> | BfR-EC-15046 | O80:r         | EPEC             | chicken      | meat         | -   |
| <i>Escherichia coli</i> | BfR-EC-15050 | O145:[H40]    | EPEC             | chicken      | meat         | +   |
| <i>Escherichia coli</i> | BfR-EC-15051 | O68:H28       | EPEC             | chicken      | meat         | -   |
| <i>Escherichia coli</i> | BfR-EC-15052 | O26:H31       | EPEC             | chicken      | meat         | +   |
| <i>Escherichia coli</i> | BfR-EC-15054 | O82:H40       | EPEC             | chicken      | meat         | +   |
| <i>Escherichia coli</i> | BfR-EC-15058 | Or:H10        | EPEC             | chicken      | meat         | +   |
| <i>Escherichia coli</i> | BfR-EC-15059 | ONT:NT        | EPEC             | chicken      | meat         | -   |
| <i>Escherichia coli</i> | BfR-EC-15061 | O111:[H25]    | STEC, stx2+      | cattle       | milk         | -   |
| <i>Escherichia coli</i> | BfR-EC-15083 | O157:[H7]     | STEC, stx2+      | cattle       | faeces       | -   |
| <i>Escherichia coli</i> | BfR-EC-15108 | O111:[H29]    | STEC, stx2+      | cattle       | meat         | +   |
| <i>Escherichia coli</i> | BfR-EC-15112 | O51:[H40]     | EPEC             | turkey       | meat         | +   |
| <i>Escherichia coli</i> | BfR-EC-15113 | ONT:H10       | EPEC             | chicken      | inner organs | (+) |
| <i>Escherichia coli</i> | BfR-EC-15118 | O111:[H8]     | EPEC             | plant        | plant        | +   |
| <i>Escherichia coli</i> | BfR-EC-15120 | O40:H45       | EPEC             | chicken      | meat         | +   |
| <i>Escherichia coli</i> | BfR-EC-15123 | O2:H40        | EPEC             | chicken      | meat         | +   |
| <i>Escherichia coli</i> | BfR-EC-15127 | O45:NM        | EPEC             | chicken      | meat         | +   |
| <i>Escherichia coli</i> | BfR-EC-15128 | O2:H40        | EPEC             | chicken      | meat         | +   |
| <i>Escherichia coli</i> | BfR-EC-15172 | O145:H31      | commensal        | cattle       | faeces       | +   |
| <i>Escherichia coli</i> | BfR-EC-15190 | O123:H40      | EPEC             | chicken      | meat         | +   |
| <i>Escherichia coli</i> | BfR-EC-15238 | O157:[H7]     | STEC, stx1+stx2+ | cattle       | faeces       | -   |
| <i>Escherichia coli</i> | BfR-EC-15265 | ONT:H40       | EPEC             | chicken      | meat         | +   |
| <i>Escherichia coli</i> | BfR-EC-15268 | O123/186:H40  | EPEC             | chicken      | meat         | +   |
| <i>Escherichia coli</i> | BfR-EC-15272 | O61:NM        | EPEC             | chicken      | meat         | +   |
| <i>Escherichia coli</i> | BfR-EC-15273 | O145:H40      | EPEC             | chicken      | meat         | +   |
| <i>Escherichia coli</i> | BfR-EC-15374 | ONT:H40       | EPEC             | chicken      | meat         | +   |
| <i>Escherichia coli</i> | BfR-EC-15375 | O6:H49        | EPEC             | chicken      | meat         | +   |
| <i>Escherichia coli</i> | BfR-EC-15378 | O145:[H40]    | EPEC             | chicken      | meat         | +   |
| <i>Escherichia coli</i> | BfR-EC-15384 | O121:[H19]    | STEC, stx1+      | sheep        | milk         | +   |
| <i>Escherichia coli</i> | BfR-EC-15386 | ONT:H10       | EPEC             | chicken      | meat         | +   |
| <i>Escherichia coli</i> | BfR-EC-15387 | O80:H26       | EPEC             | chicken      | meat         | -   |
| <i>Escherichia coli</i> | BfR-EC-15389 | O108/130:H9   | EPEC             | chicken      | meat         | +   |
| <i>Escherichia coli</i> | BfR-EC-15393 | O71:H40       | EPEC             | chicken      | meat         | -   |
| <i>Escherichia coli</i> | BfR-EC-15394 | O123/186:H40  | EPEC             | chicken      | meat         | +   |
| <i>Escherichia coli</i> | BfR-EC-15417 | O19:H28       | commensal        | goose        | inner organs | +   |
| <i>Escherichia coli</i> | BfR-EC-15421 | O154:H16      | commensal        | goose        | unknown      | +   |
| <i>Escherichia coli</i> | BfR-EC-15502 | O123/ 186:H40 | EPEC             | chicken      | meat         | +   |
| <i>Escherichia coli</i> | BfR-EC-15564 | O145:[H28]    | EPEC             | domestic pig | faeces       | +   |
| <i>Escherichia coli</i> | BfR-EC-15566 | O145:[H28]    | EPEC             | domestic pig | faeces       | +   |
| <i>Escherichia coli</i> | BfR-EC-15652 | O157:[H7]     | STEC, stx1+stx2+ | cattle       | faeces       | -   |
| <i>Escherichia coli</i> | BfR-EC-15812 | O157:[H7]     | STEC, stx2+      | cattle       | cheese       | -   |
| <i>Escherichia coli</i> | BfR-EC-15938 | O157:[H7]     | STEC, stx2+      | cattle       | milk         | -   |
| <i>Escherichia coli</i> | BfR-EC-15942 | O103:[H2]     | STEC, stx1+      | cattle       | meat         | +   |
| <i>Escherichia coli</i> | BfR-EC-15972 | O157:[H7]     | STEC, stx1+stx2+ | cattle       | faeces       | -   |
| <i>Escherichia coli</i> | BfR-EC-16053 | O103:[H2]     | STEC, stx1+      | cattle       | faeces       | (+) |
| <i>Escherichia coli</i> | BfR-EC-16463 | O2:H5         | commensal        | chicken      | meat         | +   |
| <i>Escherichia coli</i> | BfR-EC-16464 | O33:H10       | commensal        | chicken      | meat         | +   |

|                         |              |            |                  |              |                        |     |
|-------------------------|--------------|------------|------------------|--------------|------------------------|-----|
| <i>Escherichia coli</i> | BfR-EC-16465 | ONT:NM     | commensal        | chicken      | meat                   | +   |
| <i>Escherichia coli</i> | BfR-EC-16466 | O33:H10    | commensal        | chicken      | meat                   | +   |
| <i>Escherichia coli</i> | BfR-EC-16467 | O33:H10    | commensal        | chicken      | meat                   | +   |
| <i>Escherichia coli</i> | BfR-EC-16468 | O33:H10    | commensal        | chicken      | meat                   | +   |
| <i>Escherichia coli</i> | BfR-EC-16469 | O33:H10    | commensal        | chicken      | meat                   | +   |
| <i>Escherichia coli</i> | BfR-EC-16470 | O33:H10    | commensal        | chicken      | meat                   | +   |
| <i>Escherichia coli</i> | BfR-EC-16627 | O26:[H11]  | STEC, stx1+      | cattle       | cheese                 | (+) |
| <i>Escherichia coli</i> | BfR-EC-16636 | O121:[H19] | EPEC             | wild animals | meat                   | +   |
| <i>Escherichia coli</i> | BfR-EC-16666 | O103:[H2]  | STEC, stx1+      | cattle       | meat                   | +   |
| <i>Escherichia coli</i> | BfR-EC-16692 | O45:[H2]   | STEC, stx2+      | wild animals | faeces                 | +   |
| <i>Escherichia coli</i> | BfR-EC-16734 | O121:[H10] | STEC, stx2+      | domestic pig | meat                   | +   |
| <i>Escherichia coli</i> | BfR-EC-16972 | O103:[H2]  | STEC, stx1+      | cattle       | meat                   | (+) |
| <i>Escherichia coli</i> | BfR-EC-16975 | O87:[H16]  | STEC, stx2+      | chicken      | egg                    | +   |
| <i>Escherichia coli</i> | BfR-EC-17175 | O145:[H28] | STEC, stx2+      | plant        | plant                  | +   |
| <i>Escherichia coli</i> | BfR-EC-17218 | O145:[H28] | STEC, stx2+      | cattle       | cheese                 | +   |
| <i>Escherichia coli</i> | BfR-EC-17223 | O121:[H14] | STEC, stx1+      | cattle       | meat                   | +   |
| <i>Escherichia coli</i> | BfR-EC-17240 | O26:[H11]  | STEC, stx1+      | wild animals | faeces                 | +   |
| <i>Escherichia coli</i> | BfR-EC-17596 | O54:[H21]  | STEC, stx2e+     | turkey       | raw sausage            | +   |
| <i>Escherichia coli</i> | BfR-EC-17618 | O26:[H11]  | STEC, stx1+      | cattle       | milk                   | +   |
| <i>Escherichia coli</i> | BfR-EC-17761 | O121:[H19] | EPEC             | plant        | plant                  | +   |
| <i>Escherichia coli</i> | BfR-EC-17783 | O98:[H21]  | STEC, stx1+      | cattle       | milk                   | (+) |
| <i>Escherichia coli</i> | BfR-EC-17804 | O26:[H11]  | EPEC             | cattle       | cheese                 | +   |
| <i>Escherichia coli</i> | BfR-EC-17836 | O26:[H11]  | STEC, stx2+      | cattle       | cheese                 | +   |
| <i>Escherichia coli</i> | BfR-EC-17944 | O113:[H21] | STEC, stx2+      | cattle       | meat                   | (+) |
| <i>Escherichia coli</i> | BfR-EC-17949 | O109:[H16] | STEC, stx1+      | cattle       | milk                   | (+) |
| <i>Escherichia coli</i> | BfR-EC-17971 | O103:[H2]  | STEC, stx1+      | cattle       | faeces                 | +   |
| <i>Escherichia coli</i> | BfR-EC-17972 | O111:[H29] | STEC, stx1+      | cattle       | faeces                 | +   |
| <i>Escherichia coli</i> | BfR-EC-17986 | O8:[H9]    | STEC, stx2+      | domestic pig | meat                   | (+) |
| <i>Escherichia coli</i> | BfR-EC-18006 | O184:[H2]  | STEC, stx1+      | cattle       | faeces                 | (+) |
| <i>Escherichia coli</i> | BfR-EC-18009 | O26:[H11]  | STEC, stx1+      | cattle       | faeces                 | +   |
| <i>Escherichia coli</i> | BfR-EC-18019 | O157:[H7]  | STEC, stx1+stx2+ | plant        | plant                  | -   |
| <i>Escherichia coli</i> | BfR-EC-18033 | nd         | EPEC             | cattle       | appendix content       | +   |
| <i>Hafnia alvei</i>     | BfR-EC-15818 | ONT:HNM    | nd               | cattle       | cheese (from raw milk) | -   |
| <i>Hafnia alvei</i>     | BfR-EC-15819 | Or:HNM     | nd               | cattle       | cheese (from raw milk) | -   |
| <i>Hafnia alvei</i>     | BfR-EC-15932 | O91:HNM    | nd               | wild animals | meat                   | -   |

nd, not determined

**Table S2: Absence of false-positive *uidA* signals in negative controls using different Taq Polymerases and the amplification control IPC-ntb2.**

| Sample name          | Experiment ID | Taq Polymerase                       | U or x-fold /reaction | Ct of <i>uidA</i> | Ct of IPC-ntb2 |
|----------------------|---------------|--------------------------------------|-----------------------|-------------------|----------------|
| 1000 copies IPC-ntb2 | 1             | Platinum Taq                         | 2                     | undetermined      | 28,94          |
| 1000 copies IPC-ntb2 | 1             | Platinum Taq                         | 2                     | undetermined      | 29,24          |
| 25 copies IPC-ntb2   | 2             | Platinum Taq                         | 2                     | undetermined      | 34,07          |
| 25 copies IPC-ntb2   | 2             | Platinum Taq                         | 2                     | undetermined      | 34,60          |
| 25 copies IPC-ntb2   | 3             | Platinum Taq                         | 2                     | undetermined      | 34,29          |
| 25 copies IPC-ntb2   | 3             | Platinum Taq                         | 2                     | undetermined      | 34,11          |
| 25 copies IPC-ntb2   | 4             | Platinum Taq                         | 2                     | undetermined      | 33,54          |
| 25 copies IPC-ntb2   | 4             | Platinum Taq                         | 2                     | undetermined      | 33,56          |
| 25 copies IPC-ntb2   | 5             | Platinum Taq                         | 2                     | undetermined      | 34,88          |
| 25 copies IPC-ntb2   | 5             | Platinum Taq                         | 2                     | undetermined      | 34,63          |
| 25 copies IPC-ntb2   | 6             | Platinum Taq                         | 2                     | undetermined      | 34,23          |
| 25 copies IPC-ntb2   | 6             | Platinum Taq                         | 2                     | undetermined      | 34,11          |
| 25 copies IPC-ntb2   | 7             | Platinum Taq                         | 2                     | undetermined      | 35,23          |
| 25 copies IPC-ntb2   | 7             | Platinum Taq                         | 2                     | undetermined      | 34,59          |
| 25 copies IPC-ntb2   | 8             | Platinum Taq                         | 2                     | undetermined      | 34,94          |
| 25 copies IPC-ntb2   | 8             | Platinum Taq                         | 2                     | undetermined      | 34,22          |
| 25 copies IPC-ntb2   | 9             | Platinum Taq                         | 2                     | undetermined      | 32,27          |
| 25 copies IPC-ntb2   | 9             | Platinum Taq                         | 2                     | undetermined      | 33,22          |
| 25 copies IPC-ntb2   | 10            | Platinum Taq                         | 2                     | undetermined      | 33,75          |
| 25 copies IPC-ntb2   | 10            | Platinum Taq                         | 2                     | undetermined      | 34,41          |
| 25 copies IPC-ntb2   | 11            | Platinum Taq                         | 2                     | undetermined      | 33,05          |
| 25 copies IPC-ntb2   | 11            | Platinum Taq                         | 2                     | undetermined      | 34,04          |
| 25 copies IPC-ntb2   | 12            | TaqMan Gene Expression Master Mix    | 2x                    | undetermined      | 36,79          |
| 25 copies IPC-ntb2   | 12            | Quanti Tect Multiplex PCR Master Mix | 2x                    | undetermined      | 34,63          |
| 25 copies IPC-ntb2   | 13            | Quanti Tect Multiplex PCR Master Mix | 2x                    | undetermined      | 34,67          |
| 25 copies IPC-ntb2   | 13            | TaqMan Gene Expression Master Mix    | 2x                    | undetermined      | 38,65          |
| 25 copies IPC-ntb2   | 14            | TaqMan Gene Expression Master Mix    | 2x                    | undetermined      | 37,19          |
| 25 copies IPC-ntb2   | 15            | TaqMan Gene Expression Master Mix    | 2x                    | undetermined      | 34,92          |
| 25 copies IPC-ntb2   | 16            | Platinum Taq                         | 2                     | Undetermined      | 34,49          |
| 25 copies IPC-ntb2   | 16            | Platinum Taq                         | 4                     | Undetermined      | 35,19          |
| 25 copies IPC-ntb2   | 16            | Platinum Taq                         | 10                    | Undetermined      | 34,93          |
| 25 copies IPC-ntb2   | 16            | Platinum Taq                         | 20                    | Undetermined      | 35,21          |

All qPCR runs contained positive control samples, which amplified the target *uidA*-P-JOE.
